# Supplementary material for: Trends in the Use of Promotional Language (Hype) in National Institutes of Health Funding Opportunity Announcements, 1992-2020
Source: PubMed Central journal article supplement (PMC9679874; doi:10.1001/jamanetworkopen.2022.43221), 2022-11-21
Supplement: jamanetwopen-e2243221-s001.pdf [file jamanetwopen-e2243221-s001.pdf]

## Data Sharing Statement

Millar. Trends in the Use of Promotional Language (Hype) in National Institutes of Health Funding Opportunity Announcements, 1992-2020. *JAMA Netw Open*. Published November 21, 2022. doi:10.1001/jamanetworkopen.2022.43221

### Data

**Data available:** Yes

**Data types:** Data (not involving human participants)

**How to access data:** [millar.neil.gm@u.tsukuba.ac.jp](mailto:millar.neil.gm@u.tsukuba.ac.jp)

**When available:** With publication

### Supporting Documents

**Document types:** None

### Additional Information

**Who can access the data:** anyone requesting the data

**Types of analyses:** for replication of these findings

**Mechanisms of data availability:** without investigator support
